# Supplementary material for: Complete Genomic Characterisation and Mutation Patterns of Iraqi SARS-CoV-2 Isolates
Source: MDPI journal article supplement (doi:10.3390/diagnostics13010008), 2022-12-21
Supplement: s1 [file s1]

Supplementary Table S1. Full genomic annotations of 10 Duhok isolates from the third wave of the SARS-CoV-2 pandemic

| Genomic region    | Nucleotide variation | AA change     | Isolates         | Exonic Function   | Mutation per region | % of total mutations |
|-------------------|----------------------|---------------|------------------|-------------------|---------------------|----------------------|
| 5'UTR             | G210T                | NA            | all 10 samples   | Upstream          | 3                   | 2.941176471          |
| 5'UTR             | C241T                | NA            | all 10 samples   | Upstream          |                     |                      |
| 5'UTR             | G242T                | NA            | 6                | Upstream          |                     |                      |
| ORF1a;ORF1ab;nsp1 | NA                   | NA            | NA               | NA                | 0                   | 0                    |
| ORF1a;ORF1ab;nsp2 | C2062T               | <b>A419A</b>  | 4                | synonymous SNV    | 2                   | 1.960784314          |
| ORF1a;ORF1ab;nsp2 | C2094T               | <b>S430L</b>  | 1                | nonsynonymous SNV |                     |                      |
| ORF1a;ORF1ab;nsp3 | C3037T               | <b>F106F</b>  | all 10 samples   | synonymous SNV    | 17                  | 16.66666667          |
| ORF1a;ORF1ab;nsp3 | C3096T               | <b>S126L</b>  | 5                | nonsynonymous SNV |                     |                      |
| ORF1a;ORF1ab;nsp3 | C3099A               | <b>T127N</b>  | 7                | nonsynonymous SNV |                     |                      |
| ORF1a;ORF1ab;nsp3 | G3320A               | <b>V201I</b>  | 3                | nonsynonymous SNV |                     |                      |
| ORF1a;ORF1ab;nsp3 | G4181T               | <b>A488S</b>  | 1,2,3,4,5,6,7,10 | nonsynonymous SNV |                     |                      |
| ORF1a;ORF1ab;nsp3 | C4575T               | <b>T619I</b>  | 3                | nonsynonymous SNV |                     |                      |
| ORF1a;ORF1ab;nsp3 | T4888C               | <b>P723P</b>  | 8,9              | synonymous SNV    |                     |                      |
| ORF1a;ORF1ab;nsp3 | G5062A               | <b>L781L</b>  | 6                | synonymous SNV    |                     |                      |
| ORF1a;ORF1ab;nsp3 | C5184T               | <b>P822L</b>  | 8,9              | nonsynonymous SNV |                     |                      |
| ORF1a;ORF1ab;nsp3 | A5462C               | <b>S915R</b>  | 2,5              | nonsynonymous SNV |                     |                      |
| ORF1a;ORF1ab;nsp3 | A5584G               | <b>T955T</b>  | 8,9              | synonymous SNV    |                     |                      |
| ORF1a;ORF1ab;nsp3 | T5653C               | <b>Y978Y</b>  | 6                | synonymous SNV    |                     |                      |
| ORF1a;ORF1ab;nsp3 | C6402T               | <b>P1228L</b> | 1,2,3,4,5,6,7,10 | nonsynonymous SNV |                     |                      |
| ORF1a;ORF1ab;nsp3 | C7124T               | <b>P1469S</b> | 1,2,3,4,5,6,7,10 | nonsynonymous SNV |                     |                      |
| ORF1a;ORF1ab;nsp3 | T7657G               | <b>F1646L</b> | 9                | nonsynonymous SNV |                     |                      |
| ORF1a;ORF1ab;nsp3 | A7886G               | <b>I1723V</b> | 8,9              | nonsynonymous SNV |                     |                      |
| ORF1a;ORF1ab;nsp3 | C7955T               | <b>L1746F</b> | 3                | nonsynonymous SNV |                     |                      |
| ORF1a;ORF1ab;nsp4 | T8737C               | <b>D61D</b>   | 2,3,5,7          | synonymous SNV    | 7                   | 6.862745098          |
| ORF1a;ORF1ab;nsp4 | C8986T               | <b>D144D</b>  | 1,2,3,4,5,6,7,10 | synonymous SNV    |                     |                      |
| ORF1a;ORF1ab;nsp4 | G9053T               | <b>V167L</b>  | 1,2,3,4,5,6,7,10 | nonsynonymous SNV |                     |                      |
| ORF1a;ORF1ab;nsp4 | C9474T               | <b>A307V</b>  | 1                | nonsynonymous SNV |                     |                      |
| ORF1a;ORF1ab;nsp4 | C9857T               | <b>L435L</b>  | 8,9              | synonymous SNV    |                     |                      |
| ORF1a;ORF1ab;nsp4 | C9891T               | <b>A446V</b>  | 8,9              | nonsynonymous SNV |                     |                      |
| ORF1a;ORF1ab;nsp4 | C10029T              | <b>T492I</b>  | 1,2,3,4,5,6,7,10 | nonsynonymous SNV |                     |                      |
| ORF1a;ORF1ab;nsp5 | C10232T              | <b>R60C</b>   | 10               | nonsynonymous SNV | 2                   | 1.960784314          |

|                    |              |                   |                  |                        |    |             |
|--------------------|--------------|-------------------|------------------|------------------------|----|-------------|
| ORF1a;ORF1ab;nsp5  | C10279T      | <b>L75L</b>       | 5                | synonymous SNV         |    |             |
| ORF1a;ORF1ab;nsp6  | A11201G      | <b>T77A</b>       | 1,2,3,4,5,6,7,10 | nonsynonymous SNV      | 5  | 4.901960784 |
| ORF1a;ORF1ab;nsp6  | A11332G      | <b>V120V</b>      | 1,2,3,4,5,6,7,10 | synonymous SNV         |    |             |
| ORF1a;ORF1ab;nsp6  | T11418C      | <b>V149A</b>      | 8,9              | nonsynonymous SNV      |    |             |
| ORF1a;ORF1ab;nsp6  | C11514T      | <b>T181I</b>      | 8,9              | nonsynonymous SNV      |    |             |
| ORF1a;ORF1ab;nsp6  | C11671T      | <b>R233R</b>      | 8,9              | synonymous SNV         |    |             |
| ORF1a;ORF1ab;nsp7  | NA           |                   |                  |                        |    |             |
| ORF1a;ORF1ab;nsp8  | C12676T      | <b>V195V</b>      | 7                | synonymous SNV         | 1  | 0.980392157 |
| ORF1a;ORF1ab;nsp9  | C13019T      | <b>L112L</b>      | 8,9              | synonymous SNV         | 1  | 0.980392157 |
| ORF1a;ORF1ab;nsp10 | C13168T      | <b>H48H</b>       | 10               | synonymous SNV         | 1  | 0.980392157 |
| ORF1ab;nsp12       | A13620G      | <b>D60D</b>       | 10               | synonymous SNV         | 10 | 9.803921569 |
| ORF1ab;nsp12       | A13748G      | <b>K103R</b>      | 1,4,6            | nonsynonymous SNV      |    |             |
| ORF1ab;nsp12       | G14118T      | <b>T226T</b>      | 4                | synonymous SNV         |    |             |
| ORF1ab;nsp12       | A14246G      | <b>D269G</b>      | 8,9              | nonsynonymous SNV      |    |             |
| ORF1ab;nsp12       | C14407T      | <b>P323S</b>      | 10               | nonsynonymous SNV      |    |             |
| ORF1ab;nsp12       | C14408T      | <b>P323L</b>      | all 10 samples   | nonsynonymous SNV      |    |             |
| ORF1ab;nsp12       | C14599T      | <b>L387L</b>      | 4                | synonymous SNV         |    |             |
| ORF1ab;nsp12       | T14769C      | <b>A443A</b>      | 2                | synonymous SNV         |    |             |
| ORF1ab;nsp12       | C14805T      | <b>Y455Y</b>      | 2,3,5,7          | synonymous SNV         |    |             |
| ORF1ab;nsp12       | G15451A      | <b>G671S</b>      | all 10 samples   | nonsynonymous SNV      |    |             |
| ORF1ab;nsp13       | C16466T      | <b>P5401L</b>     | all 10 samples   | nonsynonymous SNV      | 2  | 1.960784314 |
| ORF1ab;nsp13       | C16726T      | <b>H5488Y</b>     | 4                | nonsynonymous SNV      |    |             |
| ORF1ab;nsp14       | A19008C      | <b>A6248A</b>     | 8,9              | synonymous SNV         | 2  | 1.960784314 |
| ORF1ab;nsp14       | C19220T      | <b>A6319V</b>     | 1,2,3,4,5,6,7,10 | nonsynonymous SNV      |    |             |
| ORF1ab;nsp15       | G20464T      | <b>D6734Y</b>     | 7                | nonsynonymous SNV      | 1  | 0.980392157 |
| ORF1ab;nsp16       | G20808A      | <b>L6848L</b>     | 6                | synonymous SNV         | 2  | 1.960784314 |
| ORF1ab;nsp16       | G21255C      | <b>A6997A</b>     | 1,4,6            | synonymous SNV         |    |             |
| S                  | o            | <b>T19R</b>       | all 10 samples   | nonsynonymous SNV      | 22 | 21.56862745 |
| S                  | C21622T      | <b>T20T</b>       | 10               | synonymous SNV         |    |             |
| S                  | A21647G      | <b>T29A</b>       | 2,3,5,7          | nonsynonymous SNV      |    |             |
| S                  | C21721T      | <b>D53D</b>       | 1,4,6            | synonymous SNV         |    |             |
| S                  | G21800T      | <b>D80Y</b>       | 4                | nonsynonymous SNV      |    |             |
| S                  | C21811T      | <b>V83V</b>       | 3                | synonymous SNV         |    |             |
| S                  | C21846T      | <b>T95I</b>       | 1,4,6,19         | nonsynonymous SNV      |    |             |
| S                  | G21987A      | <b>G142D</b>      | all 10 samples   | nonsynonymous SNV      |    |             |
| S                  | G22021T      | <b>M153I</b>      | 10               | nonsynonymous SNV      |    |             |
| S                  | AGTTCA22029. | <b>156_158del</b> | all 10 samples   | nonframeshift deletion |    |             |
| S                  | C22227T      | <b>A222V</b>      | 8,9              | nonsynonymous SNV      |    |             |

|       |              |                   |                  |                        |   |             |
|-------|--------------|-------------------|------------------|------------------------|---|-------------|
| S     | C22264T      | <b>N234N</b>      | 5                | synonymous SNV         |   |             |
| S     | C22311T      | <b>T250I</b>      | 2,3,5,7          | nonsynonymous SNV      |   |             |
| S     | C22858T      | <b>C432C</b>      | 3                | synonymous SNV         |   |             |
| S     | T22917G      | <b>L452R</b>      | all 10 samples   | nonsynonymous SNV      |   |             |
| S     | C22995A      | <b>T478K</b>      | all 10 samples   | nonsynonymous SNV      |   |             |
| S     | A23403G      | <b>D614G</b>      | all 10 samples   | nonsynonymous SNV      |   |             |
| S     | C23557T      | <b>P665P</b>      | 10               | synonymous SNV         |   |             |
| S     | C23604G      | <b>P681R</b>      | all 10 samples   | nonsynonymous SNV      |   |             |
| S     | A23848G      | <b>Q762Q</b>      | 8,9              | synonymous SNV         |   |             |
| S     | G24410A      | <b>D950N</b>      | all 10 samples   | nonsynonymous SNV      |   |             |
| S     | C25047T      | <b>P1162L</b>     | 2                | nonsynonymous SNV      |   |             |
| ORF3a | C25469T      | <b>S26L</b>       | all 10 samples   | nonsynonymous SNV      | 4 | 3.921568627 |
| ORF3a | C25584T      | <b>T64T</b>       | 2,3,5,7          | synonymous SNV         |   |             |
| ORF3a | C25667T      | <b>S92L</b>       | 4                | nonsynonymous SNV      |   |             |
| ORF3a | G25996T      | <b>V202L</b>      | 10               | nonsynonymous SNV      |   |             |
| M     | C26684G      | <b>L54L</b>       | 7                | synonymous SNV         | 2 | 1.960784314 |
| M     | T26767C      | <b>I82T</b>       | all 10 samples   | nonsynonymous SNV      |   |             |
| ORF6  | C27371T      | <b>P57L</b>       | 8,9              | nonsynonymous SNV      | 1 | 0.980392157 |
| ORF7a | G27461T      | <b>C23F</b>       | 10               | nonsynonymous SNV      | 4 | 3.921568627 |
| ORF7a | C27476T      | <b>T28I</b>       | 10               | nonsynonymous SNV      |   |             |
| ORF7a | T27638C      | <b>V82A</b>       | all 10 samples   | nonsynonymous SNV      |   |             |
| ORF7a | C27752T      | <b>T120I</b>      | all 10 samples   | nonsynonymous SNV      |   |             |
| ORF7b | C27874T      | <b>T40I</b>       | 1,2,3,4,5,6,7,10 | nonsynonymous SNV      | 1 | 0.980392157 |
| ORF8  | GATTTC28248. | <b>119_120del</b> | all 10 samples   | nonframeshift deletion | 1 | 0.980392157 |
| N     | A28461G      | <b>D63G</b>       | all 10 samples   | nonsynonymous SNV      | 7 | 6.862745098 |
| N     | C28677T      | <b>T135I</b>      | 10               | nonsynonymous SNV      |   |             |
| N     | G28881T      | <b>R203M</b>      | all 10 samples   | nonsynonymous SNV      |   |             |
| N     | G28916T      | <b>G215C</b>      | 1,2,3,4,5,6,7,10 | nonsynonymous SNV      |   |             |
| N     | G28936T      | <b>L221F</b>      | 7                | nonsynonymous SNV      |   |             |
| N     | C29284T      | <b>I337I</b>      | 2                | synonymous SNV         |   |             |
| N     | G29402T      | <b>D377Y</b>      | all 10 samples   | nonsynonymous SNV      |   |             |
| ORF10 | A29567G      | <b>I4V</b>        | 4                | nonsynonymous SNV      | 1 | 0.980392157 |
| 3'UTR | A29706G      | <b>NA</b>         | 3                | Downstream             | 3 | 2.941176471 |
| 3'UTR | G29742T      | <b>NA</b>         | all 10 samples   | Downstream             |   |             |
| 3'UTR | A29767C      | <b>NA</b>         | 3                | Downstream             |   |             |

|       |  |     |  |
|-------|--|-----|--|
| Total |  | 102 |  |
|-------|--|-----|--|

UTR: Un-translated region

NA: Not available

SNV: Single nucleotide variation

AA: Amino acids

Supplementary Table S2. Full genomic annotations of 2 Duhok isolates from the fifth wave of the SARS-CoV-2 pandemic

| Genomic region    | Nucleotide variation | AA change  | Isolates | Exonic Function        | Mutation per region | % of tatotal muattions |
|-------------------|----------------------|------------|----------|------------------------|---------------------|------------------------|
| 5'UTR             | C44T                 | .          |          | upstream               | 2                   | 2.5                    |
| 5'UTR             | C241T                | .          |          | upstream               |                     |                        |
| ORF1a;ORF1ab;nsp1 | C313T                | L16L       | exonic   | synonymous SNV         | 2                   | 2.5                    |
| ORF1a;ORF1ab;nsp1 | T670G                | S135R      | exonic   | nonsynonymous SNV      |                     |                        |
| ORF1a;ORF1ab;nsp2 | C1627T               | L274L      | exonic   | synonymous SNV         | 1                   | 1.25                   |
| ORF1a;ORF1ab;nsp3 | C2790T               | T24I       | exonic   | nonsynonymous SNV      | 4                   | 5                      |
| ORF1a;ORF1ab;nsp3 | C3037T               | F106F      | exonic   | synonymous SNV         |                     |                        |
| ORF1a;ORF1ab;nsp3 | G4184A               | G489S      | exonic   | nonsynonymous SNV      |                     |                        |
| ORF1a;ORF1ab;nsp3 | C4321T               | A534A      | exonic   | synonymous SNV         |                     |                        |
| ORF1a;ORF1ab;nsp4 | C9344T               | L264F      | exonic   | nonsynonymous SNV      | 5                   | 6.25                   |
| ORF1a;ORF1ab;nsp4 | A9424G               | V290V      | exonic   | synonymous SNV         |                     |                        |
| ORF1a;ORF1ab;nsp4 | C9534T               | T327I      | exonic   | nonsynonymous SNV      |                     |                        |
| ORF1a;ORF1ab;nsp4 | T9574C               | G340G      | exonic   | synonymous SNV         |                     |                        |
| ORF1a;ORF1ab;nsp4 | C10029T              | T492I      | exonic   | nonsynonymous SNV      |                     |                        |
| ORF1a;ORF1ab;nsp5 | C10198T              | D48D       | exonic   | synonymous SNV         | 3                   | 3.75                   |
| ORF1a;ORF1ab;nsp5 | G10447A              | R131R      | exonic   | synonymous SNV         |                     |                        |
| ORF1a;ORF1ab;nsp5 | C10449A              | P132H      | exonic   | nonsynonymous SNV      |                     |                        |
| ORF1a;ORF1ab;nsp6 | TCTGGTTTT            | 106_108del | exonic   | nonframeshift deletion | 2                   | 2.5                    |
| ORF1a;ORF1ab;nsp6 | C11396               | L142F      | exonic   | nonsynonymous SNV      |                     |                        |
| ORF1a;ORF1ab;nsp8 | G12160A              | E23E       | exonic   | synonymous SNV         | 2                   | 2.5                    |
| ORF1a;ORF1ab;nsp8 | G12310A              | Q73Q       | exonic   | synonymous SNV         |                     |                        |
| ORF1a;ORF1ab;nsp9 | C12880T              | I65I       | exonic   | synonymous SNV         | 1                   | 1.25                   |
| ORF1ab;nsp12      | C14408T              | P323L      | exonic   | nonsynonymous SNV      | 2                   | 2.5                    |
| ORF1ab;nsp12      | C15714T              | L758L      | exonic   | synonymous SNV         |                     |                        |
| ORF1ab;nsp13      | C16616A              | T5451N     | exonic   | nonsynonymous SNV      | 2                   | 2.5                    |
| ORF1ab;nsp13      | C17410T              | R5716C     | exonic   | nonsynonymous SNV      |                     |                        |
| ORF1ab;nsp14      | A18163G              | I5967V     | exonic   | nonsynonymous SNV      | 1                   | 1.25                   |
| ORF1ab;nsp15      | C19955T              | T6564I     | exonic   | nonsynonymous SNV      | 2                   | 2.5                    |
| ORF1ab;nsp15      | A20055G              | E6597E     | exonic   | synonymous SNV         |                     |                        |
| S                 | C21618T              | T19I       | exonic   | nonsynonymous SNV      | 32                  | 39.02439024            |
| S                 | TACCCCCTG            | 24_27del   | exonic   | nonframeshift deletion |                     |                        |
| S                 | TACATG               | 68_70del   | exonic   | nonframeshift deletion |                     |                        |
| S                 | G21987A              | G142D      | exonic   | nonsynonymous          |                     |                        |

|       |         |        |        |                   |   |   |
|-------|---------|--------|--------|-------------------|---|---|
|       |         |        |        | SNV               |   |   |
| S     | T22200G | V213G  | exonic | nonsynonymous SNV |   |   |
| S     | G22578A | G339D  | exonic | nonsynonymous SNV |   |   |
| S     | C22674T | S371F  | exonic | nonsynonymous SNV |   |   |
| S     | T22679C | S373P  | exonic | nonsynonymous SNV |   |   |
| S     | C22686T | S375F  | exonic | nonsynonymous SNV |   |   |
| S     | A22688G | T376A  | exonic | nonsynonymous SNV |   |   |
| S     | G22775A | D405N  | exonic | nonsynonymous SNV |   |   |
| S     | A22786C | R408S  | exonic | nonsynonymous SNV |   |   |
| S     | G22813T | K417N  | exonic | nonsynonymous SNV |   |   |
| S     | T22882G | N440K  | exonic | nonsynonymous SNV |   |   |
| S     | T22917G | L452R  | exonic | nonsynonymous SNV |   |   |
| S     | G22992A | S477N  | exonic | nonsynonymous SNV |   |   |
| S     | C22995A | T478K  | exonic | nonsynonymous SNV |   |   |
| S     | A23013C | E484A  | exonic | nonsynonymous SNV |   |   |
| S     | T23018G | F486V  | exonic | nonsynonymous SNV |   |   |
| S     | T23042C | S494P  | exonic | nonsynonymous SNV |   |   |
| S     | A23055G | Q498R  | exonic | nonsynonymous SNV |   |   |
| S     | A23063T | N501Y  | exonic | nonsynonymous SNV |   |   |
| S     | T23075C | Y505H  | exonic | nonsynonymous SNV |   |   |
| S     | A23403G | D614G  | exonic | nonsynonymous SNV |   |   |
| S     | C23525T | H655Y  | exonic | nonsynonymous SNV |   |   |
| S     | T23599G | N679K  | exonic | nonsynonymous SNV |   |   |
| S     | C23604A | P681H  | exonic | nonsynonymous SNV |   |   |
| S     | C23854A | N764K  | exonic | nonsynonymous SNV |   |   |
| S     | G23948T | D796Y  | exonic | nonsynonymous SNV |   |   |
| S     | A24424T | Q954H  | exonic | nonsynonymous SNV |   |   |
| S     | T24469A | N969K  | exonic | nonsynonymous SNV |   |   |
| S     | C2500T  | D1146D | exonic | synonymous SNV    |   |   |
| ORF3a | C25584T | T64T   | exonic | synonymous SNV    | 4 | 5 |
| ORF3a | C25896T | V168V  | exonic | synonymous SNV    |   |   |

|         |                            |          |        |                        |    |      |
|---------|----------------------------|----------|--------|------------------------|----|------|
| ORF3a   | C26060T                    | T223I    | exonic | nonsynonymous SNV      |    |      |
| ORF3a   | G26109T                    | E239D    | exonic | nonsynonymous SNV      |    |      |
| E       | C26270T                    | T9I      | exonic | nonsynonymous SNV      | 1  | 1.25 |
| M       | G26529A                    | D3N      | exonic | nonsynonymous SNV      | 4  | 5    |
| M       | C26577G                    | Q19E     | exonic | nonsynonymous SNV      |    |      |
| M       | G26709A                    | A63T     | exonic | nonsynonymous SNV      |    |      |
| M       | C27012T                    | L164L    | exonic | synonymous SNV         |    |      |
| ORF7a   | C27513T                    | Y40Y     | exonic | synonymous SNV         | 2  | 2.5  |
| ORF7b   | C27807T                    | L18L     | exonic | synonymous SNV         |    |      |
| N       | C28311T                    | P13L     | exonic | nonsynonymous SNV      | 7  | 8.75 |
| N       | A28330G                    | G19G     | exonic | synonymous SNV         |    |      |
| N       | GAGAACGCA                  | 30_33del | exonic | nonframeshift deletion |    |      |
| N       | G28881A                    | R203K    | exonic | nonsynonymous SNV      |    |      |
| N       | G28882A                    | R203R    | exonic | synonymous SNV         |    |      |
| N       | G28883C                    | G204R    | exonic | nonsynonymous SNV      |    |      |
| N       | A29510C                    | S413R    | exonic | nonsynonymous SNV      |    |      |
| N;ORF10 | GAGGCCACGCGGAGTACGATCGAGTG | .        |        | downstream             | 1  | 1.25 |
|         |                            |          |        |                        | 80 |      |

UTR: Un-translated region

NA: Not available

SNV: Single nucleotide variation

AA: Amino acids
